# Supplementary material for: Color manipulation through microchip tinting for colorimetric detection using hue image analysis
Source: Royal Society of Chemistry journal article supplement (doi:10.1039/c7lc00796e), 2017-01-01
Supplement: c7lc00796e1.pdf [file c7lc00796e1.pdf]

**Electronic Supplementary Information for:**

**Color Manipulation through Microchip Tinting for Colorimetric Detection Using Hue Image Analysis**

Shannon T. Krauss,<sup>a</sup> Aeren Q. Nauman,<sup>b</sup> Gavin Garner,<sup>c</sup> and James P. Landers<sup>a,c,d\*</sup>

<sup>a</sup>*Department of Chemistry, University of Virginia, Charlottesville, VA 22904, USA.*

<sup>b</sup>*TeGrex Technologies, Charlottesville, VA 22904, USA.*

<sup>c</sup>*Department of Mechanical and Aerospace Engineering, University of Virginia, Charlottesville, VA 22904, USA.*

<sup>d</sup>*Department of Pathology, University of Virginia, Charlottesville, VA 22904, USA.*

\*To whom correspondence should be addressed: Email: [landers@virginia.edu](mailto:landers@virginia.edu); phone: 434-243-8658; fax 434-243-8852

## Table of Contents

|                                                                                                                                     |          |
|-------------------------------------------------------------------------------------------------------------------------------------|----------|
| <b>Figure S-1.</b> Tinting reagent paper with dye.                                                                                  | Page S-3 |
| <b>Figure S-2.</b> Images of tinting with dye on reagent paper punches.                                                             | Page S-3 |
| <b>Table S-1.</b> Threshold values for determining a positive sample of H <sub>2</sub> O <sub>2</sub> using print-based tinting.    | Page S-4 |
| <b>Table S-2.</b> Threshold values for determining a positive sample of H <sub>2</sub> O <sub>2</sub> using external light tinting. | Page S-4 |

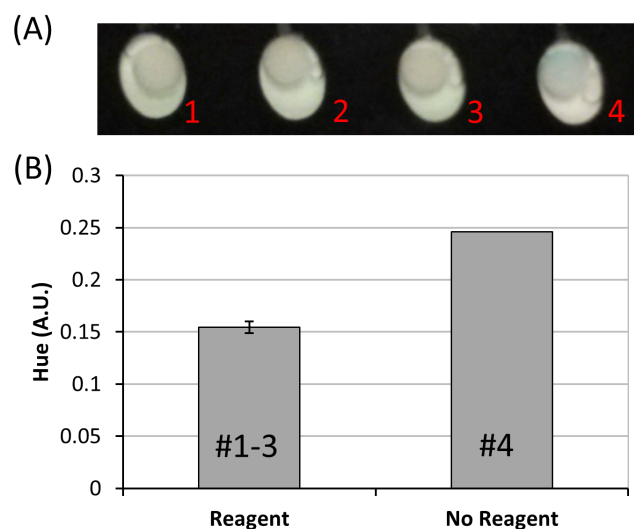

**Figure S-1.** Tinting reagent paper with dye. (A) Images of paper punches tinted with erioglucine before ammonium titanium oxalate reagent was added (1-3) and tinted without reagent added (4) punches. (B) Difference in hue response for the dye tinted punches in (A) with and without added reagent.

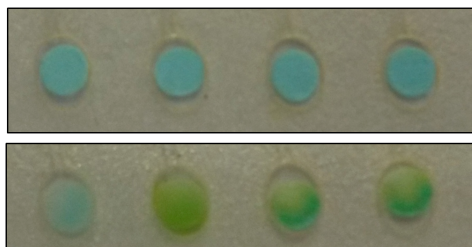

**Figure S-2.** Images of tinting with dye on reagent paper punches. Images of  $H_2O_2$  reagent punches tinted blue (top) and a heterogeneous color change with 10 mg/mL  $H_2O_2$  added to the punches (bottom).

|               |       | % Transparency |      |      |      |      |      |      |      |
|---------------|-------|----------------|------|------|------|------|------|------|------|
|               |       | 0              | 50   | 75   | 80   | 85   | 90   | 95   | 100  |
| Pe Tint Color | Red   | 0.05           | 0.06 | 0.04 | 0.07 | 0.08 | 0.09 | 0.15 | 0.31 |
|               | Green | 0.21           | 0.23 | 0.25 | 0.23 | 0.19 | 0.22 | 0.19 | 0.11 |
|               | Blue  | 0.65           | 0.63 | 0.62 | 0.57 | 0.58 | 0.58 | 0.48 | 0.11 |
|               | Cyan  | 0.53           | 0.51 | 0.53 | 0.47 | 0.50 | 0.47 | 0.36 | 0.11 |

**Table S-1.** Threshold values for determining a positive sample of H<sub>2</sub>O<sub>2</sub> using print-based tinting. Cyan, blue, and green thresholds are [0]-3 $\sigma$ . Red thresholds are [0]+3 $\sigma$ .

|                |       | Voltage |      |      |      |      |      |
|----------------|-------|---------|------|------|------|------|------|
|                |       | 8.0     | 8.2  | 8.4  | 8.6  | 8.8  | 9.0  |
| LED Tint Color | Red   | 0.04    | 0.02 | 0.03 | 0.03 | 0.06 | 0.08 |
|                | Green | 0.40    | 0.40 | 0.39 | 0.39 | 0.38 | 0.35 |
|                | Blue  | 0.61    | 0.60 | 0.59 | 0.59 | 0.59 | 0.59 |
|                | Cyan  | 0.48    | 0.48 | 0.48 | 0.48 | 0.49 | 0.49 |

**Table S-2.** Threshold values for determining a positive sample of H<sub>2</sub>O<sub>2</sub> using external light tinting. Cyan, blue, and green thresholds are [0]-3 $\sigma$ . Red thresholds are [0]+3 $\sigma$ . All hue values are in A.U.
